# Supplementary material for: Combined effect of oxygen-scavenger packaging and UV-C radiation on shelf life of refrigerated tilapia (Oreochromis niloticus) fillets
Source: PubMed Central journal article supplement (PMC7060221; doi:10.1038/s41598-020-61293-8), 2020-03-06
Supplement: 41598_2020_61293_MOESM1_ESM.pdf [file 41598_2020_61293_MOESM1_ESM.pdf]

Combined effect of oxygen-scavenger packaging and UV-C radiation on shelf life of refrigerated tilapia (*Oreochromis niloticus*) fillets

Maria Lúcia Guerra Monteiro, Eliane Teixeira Mársico, Yhan da Silva Mutz, Vinicius Silva Castro, Rodrigo Vilela de Barros Pinto Moreira, Thiago da Silveira Álvares & Carlos Adam Conte-Junior

**Supplementary Table S2.** Individual results of physicochemical parameters of tilapia (*Oreochromis niloticus*) fillets non- and treated with oxygen scavenger and ultraviolet radiation (UV-C) stored at  $4 \pm 1$  °C for 23 days.

| Days of storage | Ammonia ( $\mu\text{g NH}_3/\text{g}$ fish tissue)        |            |            |            |            |            |
|-----------------|-----------------------------------------------------------|------------|------------|------------|------------|------------|
|                 | Treatments <sup>€</sup>                                   |            |            |            |            |            |
|                 | AP                                                        | OSP        | AUV1       | OSUV1      | AUV3       | OSUV3      |
| 0               | 7.66±0.04                                                 | 7.65±0.02  | 7.66±0.08  | 7.67±0.04  | 7.64±0.08  | 7.64±0.04  |
| 1               | 7.65±0.02                                                 | 7.63±0.10  | 7.67±0.04  | 7.65±0.04  | 7.63±0.08  | 7.65±0.04  |
| 2               | 8.32±0.01                                                 | 7.89±0.01  | 8.19±0.06  | 7.69±0.01  | 8.15±0.04  | 7.71±0.03  |
| 3               | 8.43±0.10                                                 | 8.03±0.01  | 8.22±0.09  | 7.79±0.02  | 8.21±0.10  | 7.81±0.07  |
| 4               | 8.98±0.04                                                 | 8.25±0.01  | 8.51±0.04  | 7.88±0.01  | 8.50±0.06  | 7.90±0.10  |
| 5               | 9.49±0.24                                                 | 8.42±0.05  | 9.14±0.18  | 8.12±0.07  | 9.13±0.06  | 8.09±0.09  |
| 6               | 10.14±0.06                                                | 9.23±0.01  | 9.52±0.05  | 8.41±0.05  | 9.55±0.08  | 8.43±0.16  |
| 9               | 10.60±0.03                                                | 9.89±0.06  | 10.20±0.11 | 8.75±0.01  | 10.24±0.05 | 8.79±0.09  |
| 11              | 11.78±0.08                                                | 10.22±0.10 | 10.89±0.11 | 9.23±0.05  | 10.91±0.18 | 9.20±0.06  |
| 13              | 12.81±0.23                                                | 10.28±0.09 | 10.92±0.11 | 9.60±0.14  | 10.96±0.03 | 9.64±0.11  |
| 15              | NA                                                        | 10.79±0.18 | 11.46±0.05 | 9.89±0.08  | 11.47±0.03 | 9.82±0.12  |
| 17              | NA                                                        | 10.97±0.06 | 11.52±0.09 | 10.11±0.05 | 11.58±0.11 | 10.14±0.06 |
| 19              | NA                                                        | 11.33±0.05 | 11.87±0.03 | 10.57±0.03 | 11.85±0.09 | 10.58±0.04 |
| 21              | NA                                                        | 11.53±0.04 | 11.97±0.02 | 10.80±0.06 | 11.96±0.06 | 10.85±0.10 |
| 23              | NA                                                        | 11.89±0.03 | 12.28±0.13 | 11.19±0.08 | 12.25±0.08 | 11.22±0.05 |
| Days of storage | Total volatile basic nitrogen (mg TVB-N/100g fish tissue) |            |            |            |            |            |

|    | Treatments <sup>€</sup> |            |            |            |            |            |
|----|-------------------------|------------|------------|------------|------------|------------|
|    | AP                      | OSP        | AUV1       | OSUV1      | AUV3       | OSUV3      |
| 0  | 10.08±0.00              | 10.08±0.00 | 10.08±0.00 | 10.08±0.00 | 10.08±0.00 | 10.08±0.08 |
| 1  | 10.08±0.00              | 10.08±0.00 | 10.23±0.21 | 10.08±0.00 | 10.08±0.00 | 10.08±0.08 |
| 2  | 15.02±0.76              | 11.95±0.18 | 13.01±0.13 | 10.18±0.14 | 13.06±0.17 | 10.13±0.07 |
| 3  | 15.47±0.18              | 12.07±0.07 | 13.32±0.28 | 11.08±0.17 | 13.35±0.07 | 11.15±0.22 |
| 4  | 16.10±0.71              | 12.99±0.86 | 14.28±0.45 | 11.64±0.51 | 14.33±0.21 | 11.67±0.07 |
| 5  | 16.74±0.88              | 13.79±0.21 | 14.74±0.06 | 11.75±0.21 | 14.71±0.23 | 11.79±0.04 |
| 6  | 17.62±0.34              | 14.34±0.00 | 15.49±0.52 | 12.07±0.92 | 15.40±0.40 | 12.10±0.57 |
| 9  | 17.75±0.89              | 14.98±0.40 | 15.95±0.06 | 12.38±0.37 | 15.92±0.08 | 12.41±0.07 |
| 11 | 18.75±0.52              | 15.31±0.35 | 16.64±0.31 | 12.97±0.52 | 16.69±0.33 | 12.94±0.17 |
| 13 | 20.92±1.07              | 15.79±0.16 | 17.27±0.75 | 13.16±0.42 | 17.20±0.20 | 13.20±0.06 |
| 15 | NA                      | 15.77±0.04 | 17.35±0.81 | 13.67±0.95 | 17.39±0.10 | 13.74±0.40 |
| 17 | NA                      | 16.42±0.42 | 18.73±0.18 | 14.47±0.72 | 18.77±0.07 | 14.40±0.34 |
| 19 | NA                      | 20.56±0.57 | 22.73±0.13 | 15.89±0.04 | 22.79±0.38 | 15.86±0.14 |
| 21 | NA                      | 20.61±0.64 | 23.39±0.66 | 16.46±0.57 | 23.42±0.06 | 16.54±0.19 |
| 23 | NA                      | 21.62±0.65 | 23.71±0.47 | 18.29±0.49 | 23.76±0.06 | 18.34±0.31 |

Lipid oxidation (mg malondialdehyde/kg fish tissue)

| Days of storage | Treatments <sup>€</sup> |           |           |           |           |           |
|-----------------|-------------------------|-----------|-----------|-----------|-----------|-----------|
|                 | AP                      | OSP       | AUV1      | OSUV1     | AUV3      | OSUV3     |
| 0               | 0.24±0.00               | 0.24±0.00 | 0.24±0.00 | 0.26±0.02 | 0.25±0.02 | 0.26±0.02 |
| 1               | 0.42±0.01               | 0.28±0.01 | 0.54±0.01 | 0.28±0.01 | 0.64±0.01 | 0.30±0.01 |
| 2               | 0.44±0.01               | 0.27±0.00 | 0.56±0.01 | 0.29±0.03 | 0.67±0.03 | 0.31±0.03 |
| 3               | 0.50±0.01               | 0.37±0.04 | 0.61±0.03 | 0.38±0.01 | 1.04±0.00 | 0.41±0.03 |
| 4               | 0.62±0.01               | 0.44±0.01 | 0.90±0.08 | 0.46±0.04 | 1.48±0.07 | 0.46±0.04 |
| 5               | 0.91±0.07               | 0.46±0.01 | 1.39±0.11 | 0.50±0.04 | 2.10±0.08 | 0.55±0.03 |
| 6               | 1.56±0.12               | 0.65±0.03 | 2.04±0.05 | 0.69±0.05 | 2.66±0.06 | 0.66±0.01 |
| 9               | 2.10±0.01               | 0.88±0.00 | 2.37±0.06 | 0.90±0.03 | 2.85±0.02 | 0.92±0.03 |
| 11              | 2.61±0.02               | 1.44±0.04 | 2.97±0.05 | 1.46±0.01 | 3.00±0.19 | 1.50±0.04 |
| 13              | 2.88±0.04               | 1.52±0.04 | 3.09±0.05 | 1.53±0.03 | 3.52±0.00 | 1.58±0.04 |

|    |    |           |           |           |           |           |
|----|----|-----------|-----------|-----------|-----------|-----------|
| 15 | NA | 1.87±0.07 | 3.28±0.04 | 1.93±0.01 | 3.53±0.08 | 1.91±0.04 |
| 17 | NA | 2.00±0.03 | 3.47±0.06 | 1.99±0.04 | 3.89±0.01 | 2.02±0.03 |
| 19 | NA | 2.72±0.03 | 3.63±0.01 | 2.73±0.04 | 4.05±0.01 | 2.74±0.06 |
| 21 | NA | 3.02±0.04 | 3.74±0.06 | 3.05±0.08 | 4.36±0.03 | 3.05±0.13 |
| 23 | NA | 3.56±0.06 | 3.94±0.01 | 3.58±0.14 | 4.57±0.03 | 3.54±0.21 |

Protein oxidation (nmol carbonyls/mg protein)

| Days of storage | Treatments <sup>€</sup> |           |            |           |            |           |
|-----------------|-------------------------|-----------|------------|-----------|------------|-----------|
|                 | AP                      | OSP       | AUV1       | OSUV1     | AUV3       | OSUV3     |
| 0               | 1.22±0.08               | 1.31±0.09 | 1.28±0.08  | 1.22±0.08 | 1.30±0.08  | 1.33±0.10 |
| 1               | 2.47±0.16               | 1.36±0.03 | 3.53±0.28  | 1.38±0.11 | 4.41±0.21  | 1.41±0.11 |
| 2               | 3.04±0.11               | 1.94±0.08 | 4.69±0.13  | 2.12±0.16 | 4.98±0.04  | 2.06±0.16 |
| 3               | 2.84±0.14               | 2.01±0.12 | 5.90±0.22  | 2.03±0.14 | 6.52±0.22  | 2.14±0.18 |
| 4               | 4.34±0.33               | 3.14±0.12 | 6.03±0.27  | 3.19±0.14 | 6.76±0.29  | 3.26±0.17 |
| 5               | 4.93±0.27               | 3.51±0.08 | 6.70±0.14  | 3.52±0.18 | 7.34±0.27  | 3.67±0.18 |
| 6               | 5.82±0.03               | 3.83±0.06 | 6.86±0.05  | 3.92±0.12 | 7.37±0.11  | 3.94±0.15 |
| 9               | 6.47±0.06               | 3.93±0.08 | 7.48±0.08  | 3.90±0.06 | 8.60±0.21  | 4.00±0.25 |
| 11              | 7.81±0.12               | 4.30±0.17 | 8.95±0.13  | 4.26±0.24 | 9.65±0.20  | 4.23±0.20 |
| 13              | 9.44±0.15               | 5.06±0.08 | 10.27±0.06 | 5.11±0.06 | 11.93±0.30 | 5.18±0.12 |
| 15              | NA                      | 5.20±0.11 | 10.68±0.00 | 5.26±0.10 | 13.12±0.44 | 5.15±0.19 |
| 17              | NA                      | 5.86±0.12 | 11.83±0.03 | 5.94±0.07 | 14.34±0.85 | 5.96±0.13 |
| 19              | NA                      | 5.70±0.11 | 11.60±0.16 | 5.75±0.13 | 14.25±0.89 | 5.78±0.13 |
| 21              | NA                      | 6.48±0.11 | 13.13±0.67 | 6.56±0.08 | 15.31±0.73 | 6.44±0.21 |
| 23              | NA                      | 7.06±0.23 | 13.34±0.38 | 7.03±0.11 | 16.32±0.57 | 7.18±0.22 |

Results are expressed as means ± standard deviation (n = 2). NA – Not applicable. <sup>€</sup>AP (air packaging); OSP (oxygen scavenger packaging); AUV1 (air packaging + UV-C at 0.102 J/cm<sup>2</sup>); OSUV1 (oxygen scavenger packaging + UV-C at 0.102 J/cm<sup>2</sup>); AUV3 (air packaging + UV-C at 0.301 J/cm<sup>2</sup>); and OSUV3 (oxygen scavenger packaging + UV-C at 0.301 J/cm<sup>2</sup>).
