# Supplementary material for: Combined effect of oxygen-scavenger packaging and UV-C radiation on shelf life of refrigerated tilapia (Oreochromis niloticus) fillets
Source: PubMed Central journal article supplement (PMC7060221; doi:10.1038/s41598-020-61293-8), 2020-03-06
Supplement: 41598_2020_61293_MOESM2_ESM.pdf [file 41598_2020_61293_MOESM2_ESM.pdf]

Combined effect of oxygen-scavenger packaging and UV-C radiation on shelf life of refrigerated tilapia (*Oreochromis niloticus*) fillets

Maria Lúcia Guerra Monteiro, Eliane Teixeira Mársico, Yhan da Silva Mutz, Vinicius Silva Castro, Rodrigo Vilela de Barros Pinto Moreira, Thiago da Silveira Álvares & Carlos Adam Conte-Junior

**Supplementary Table S3.** Individual results of instrumental color parameters of tilapia (*Oreochromis niloticus*) fillets non- and treated with oxygen scavenger and ultraviolet radiation (UV-C) stored at  $4 \pm 1$  °C for 23 days.

| Days of storage | Lightness ( $L^*$ )     |            |            |            |            |            |
|-----------------|-------------------------|------------|------------|------------|------------|------------|
|                 | Treatments <sup>€</sup> |            |            |            |            |            |
|                 | AP                      | OSP        | AUV1       | OSUV1      | AUV3       | OSUV3      |
| 0               | 52.04±0.88              | 53.75±3.35 | 52.14±4.76 | 52.63±2.71 | 54.09±2.40 | 54.67±0.99 |
| 1               | 55.18±1.09              | 54.20±3.74 | 54.91±2.29 | 54.06±3.89 | 54.23±2.43 | 53.47±1.99 |
| 2               | 55.96±1.70              | 54.18±2.97 | 54.19±2.17 | 54.84±2.26 | 54.00±2.21 | 54.26±3.55 |
| 3               | 56.30±1.57              | 55.53±3.20 | 54.13±3.85 | 54.30±3.38 | 55.58±3.02 | 54.54±0.69 |
| 4               | 55.88±1.71              | 56.17±1.90 | 55.77±3.94 | 55.02±1.47 | 54.53±1.58 | 55.57±2.39 |
| 5               | 56.90±2.12              | 56.92±3.28 | 55.79±3.28 | 53.96±3.25 | 54.61±1.80 | 54.36±1.36 |
| 6               | 57.11±3.32              | 56.74±0.49 | 56.90±4.99 | 54.25±3.88 | 54.20±2.09 | 55.51±1.28 |
| 9               | 57.57±2.11              | 56.75±1.31 | 56.51±2.97 | 56.51±2.15 | 55.05±1.24 | 56.36±3.02 |
| 11              | 57.88±3.41              | 56.94±2.21 | 56.65±3.42 | 56.69±1.77 | 56.64±4.39 | 56.76±1.25 |
| 13              | 58.99±1.55              | 57.20±1.31 | 57.56±3.00 | 57.89±0.42 | 56.35±1.47 | 58.27±5.09 |
| 15              | NA                      | 58.92±2.56 | 58.11±1.27 | 58.84±3.66 | 58.94±3.90 | 56.58±0.55 |
| 17              | NA                      | 58.36±2.64 | 59.96±5.03 | 58.24±4.05 | 58.10±1.98 | 58.33±4.64 |
| 19              | NA                      | 59.05±3.27 | 60.03±2.98 | 59.64±2.50 | 60.28±1.65 | 58.16±0.97 |
| 21              | NA                      | 59.70±0.57 | 59.37±3.45 | 61.25±1.27 | 60.63±0.58 | 60.75±0.91 |
| 23              | NA                      | 63.24±2.13 | 64.40±1.45 | 63.51±2.17 | 65.95±1.01 | 62.84±0.89 |
| Days of storage | Redness ( $a^*$ )       |            |            |            |            |            |

|    | Treatments <sup>€</sup> |           |           |           |           |           |
|----|-------------------------|-----------|-----------|-----------|-----------|-----------|
|    | AP                      | OSP       | AUV1      | OSUV1     | AUV3      | OSUV3     |
| 0  | 1.48±0.14               | 1.46±0.14 | 1.49±0.07 | 1.46±0.06 | 1.49±0.09 | 1.47±0.10 |
| 1  | 1.56±0.06               | 1.45±0.11 | 1.81±0.06 | 1.47±0.11 | 2.17±0.20 | 1.49±0.05 |
| 2  | 1.67±0.07               | 1.51±0.11 | 1.89±0.05 | 1.53±0.13 | 2.15±0.10 | 1.56±0.07 |
| 3  | 1.83±0.09               | 1.50±0.12 | 2.20±0.12 | 1.52±0.13 | 2.72±0.08 | 1.58±0.12 |
| 4  | 1.94±0.12               | 1.69±0.10 | 2.32±0.08 | 1.65±0.14 | 2.78±0.18 | 1.68±0.09 |
| 5  | 2.01±0.05               | 1.81±0.07 | 2.67±0.09 | 1.82±0.09 | 3.11±0.10 | 1.83±0.08 |
| 6  | 2.24±0.17               | 1.89±0.05 | 2.82±0.24 | 1.81±0.12 | 3.54±0.24 | 1.84±0.11 |
| 9  | 2.73±0.22               | 2.18±0.09 | 3.51±0.16 | 2.14±0.18 | 4.00±0.21 | 2.18±0.13 |
| 11 | 3.41±0.17               | 2.37±0.18 | 3.72±0.05 | 2.36±0.08 | 4.11±0.04 | 2.39±0.13 |
| 13 | 4.26±0.35               | 2.53±0.13 | 4.86±0.16 | 2.55±0.17 | 5.33±0.11 | 2.59±0.07 |
| 15 | NA                      | 2.84±0.08 | 4.80±0.16 | 2.90±0.17 | 5.47±0.22 | 2.89±0.11 |
| 17 | NA                      | 3.27±0.21 | 4.89±0.10 | 3.33±0.14 | 5.46±0.18 | 3.37±0.05 |
| 19 | NA                      | 3.40±0.16 | 5.08±0.16 | 3.51±0.25 | 5.90±0.11 | 3.58±0.13 |
| 21 | NA                      | 3.96±0.30 | 5.18±0.34 | 3.85±0.17 | 6.10±0.45 | 3.90±0.10 |
| 23 | NA                      | 4.00±0.35 | 5.51±0.09 | 4.05±0.33 | 6.38±0.09 | 4.10±0.10 |

| Days of storage | Yellowness ( <i>b</i> *) |           |           |           |            |           |
|-----------------|--------------------------|-----------|-----------|-----------|------------|-----------|
|                 | Treatments <sup>€</sup>  |           |           |           |            |           |
|                 | AP                       | OSP       | AUV1      | OSUV1     | AUV3       | OSUV3     |
| 0               | 4.02±0.32                | 3.97±0.21 | 4.09±0.26 | 3.99±0.24 | 4.06±0.40  | 4.02±0.34 |
| 1               | 4.44±0.28                | 4.21±0.12 | 4.78±0.18 | 4.24±0.12 | 5.28±0.47  | 4.32±0.26 |
| 2               | 4.71±0.11                | 4.50±0.34 | 5.18±0.20 | 4.58±0.19 | 5.77±0.12  | 4.52±0.22 |
| 3               | 5.36±0.14                | 4.96±0.12 | 6.04±0.31 | 4.91±0.41 | 6.50±0.26  | 4.98±0.39 |
| 4               | 5.58±0.25                | 5.02±0.15 | 6.36±0.35 | 5.10±0.18 | 7.22±0.20  | 5.19±0.18 |
| 5               | 6.40±0.60                | 5.40±0.25 | 7.24±0.26 | 5.45±0.11 | 8.24±0.46  | 5.49±0.08 |
| 6               | 6.58±0.30                | 5.78±0.26 | 7.35±0.25 | 5.83±0.21 | 8.36±0.62  | 5.85±0.32 |
| 9               | 7.39±0.61                | 6.23±0.54 | 8.34±0.61 | 6.19±0.61 | 9.21±0.11  | 6.26±0.15 |
| 11              | 8.03±0.73                | 6.63±0.40 | 9.16±0.34 | 6.66±0.08 | 9.87±0.09  | 6.60±0.27 |
| 13              | 8.17±0.61                | 6.65±0.28 | 9.32±0.33 | 6.69±0.18 | 10.01±0.16 | 6.72±0.28 |

|    |    |           |            |           |            |           |
|----|----|-----------|------------|-----------|------------|-----------|
| 15 | NA | 7.02±0.30 | 9.53±0.12  | 7.09±0.11 | 10.61±0.16 | 7.15±0.11 |
| 17 | NA | 7.68±0.70 | 10.02±0.09 | 7.74±0.26 | 11.23±0.51 | 7.80±0.06 |
| 19 | NA | 7.86±0.77 | 10.11±0.68 | 7.79±0.20 | 11.34±0.69 | 7.63±0.35 |
| 21 | NA | 8.22±0.63 | 10.58±0.19 | 8.36±0.33 | 12.26±0.33 | 8.46±0.51 |
| 23 | NA | 8.81±0.08 | 10.91±0.07 | 8.91±0.33 | 12.30±0.31 | 8.79±0.12 |

Results are expressed as means ± standard deviation (n = 2). NA – Not applicable. <sup>e</sup>AP (air packaging); OSP (oxygen scavenger packaging); AUV1 (air packaging + UV-C at 0.102 J/cm<sup>2</sup>); OSUV1 (oxygen scavenger packaging + UV-C at 0.102 J/cm<sup>2</sup>); AUV3 (air packaging + UV-C at 0.301 J/cm<sup>2</sup>); and OSUV3 (oxygen scavenger packaging + UV-C at 0.301 J/cm<sup>2</sup>).
