# Supplementary material for: Combined effect of oxygen-scavenger packaging and UV-C radiation on shelf life of refrigerated tilapia (Oreochromis niloticus) fillets
Source: PubMed Central journal article supplement (PMC7060221; doi:10.1038/s41598-020-61293-8), 2020-03-06
Supplement: 41598_2020_61293_MOESM3_ESM.pdf [file 41598_2020_61293_MOESM3_ESM.pdf]

Combined effect of oxygen-scavenger packaging and UV-C radiation on shelf life of refrigerated tilapia (*Oreochromis niloticus*) fillets

Maria Lúcia Guerra Monteiro, Eliane Teixeira Mársico, Yhan da Silva Mutz, Vinicius Silva Castro, Rodrigo Vilela de Barros Pinto Moreira, Thiago da Silveira Álvares & Carlos Adam Conte-Junior

**Supplementary Table S4.** Individual results of instrumental texture parameters of tilapia (*Oreochromis niloticus*) fillets non- and treated with oxygen scavenger and ultraviolet radiation (UV-C) stored at  $4 \pm 1$  °C for 23 days.

| Days of storage | Hardness (g)            |                |                |                |                |                |
|-----------------|-------------------------|----------------|----------------|----------------|----------------|----------------|
|                 | Treatments <sup>€</sup> |                |                |                |                |                |
|                 | AP                      | OSP            | AUV1           | OSUV1          | AUV3           | OSUV3          |
| 0               | 4406.66±388.29          | 4436.71±232.88 | 4302.81±355.63 | 4411.41±60.57  | 4311.85±214.36 | 4480.95±281.40 |
| 1               | 4004.51±269.29          | 4540.46±262.45 | 3520.02±104.57 | 3922.35±26.78  | 3568.20±79.41  | 3920.73±56.43  |
| 2               | 4045.57±197.48          | 4485.45±245.45 | 3452.34±78.98  | 3916.12±86.46  | 3578.67±85.71  | 3893.93±45.50  |
| 3               | 3553.39±209.21          | 4563.17±383.05 | 3122.38±114.58 | 3862.08±76.23  | 3268.68±78.70  | 3875.43±38.65  |
| 4               | 3390.34±134.94          | 4105.25±223.89 | 2926.01±54.41  | 3716.69±122.62 | 2888.43±22.55  | 3783.37±68.87  |
| 5               | 3315.49±181.95          | 3979.05±183.95 | 2935.22±68.47  | 3521.93±39.24  | 2969.40±88.38  | 3501.86±63.72  |
| 6               | 3195.63±86.57           | 3898.99±198.07 | 2795.63±153.92 | 3364.40±121.22 | 2769.63±77.81  | 3261.85±153.95 |
| 9               | 2515.91±175.35          | 3507.56±209.31 | 2135.83±95.70  | 2872.55±49.88  | 2208.32±64.87  | 2722.29±231.35 |
| 11              | 2413.47±175.49          | 3401.54±45.41  | 2161.66±74.33  | 2876.78±86.84  | 2246.92±182.74 | 2809.83±94.62  |
| 13              | 2092.58±119.95          | 3273.41±87.96  | 1877.54±55.25  | 2652.98±106.42 | 1767.39±107.89 | 2687.57±77.46  |
| 15              | NA                      | 3078.12±61.32  | 1765.93±55.06  | 2597.51±52.36  | 1737.47±140.28 | 2613.15±134.82 |
| 17              | NA                      | 2896.42±258.81 | 1644.11±58.72  | 2330.47±105.78 | 1598.45±29.08  | 2297.14±59.80  |
| 19              | NA                      | 2725.28±204.93 | 1593.07±115.10 | 2291.03±174.63 | 1496.23±82.66  | 2277.71±59.99  |
| 21              | NA                      | 2660.77±251.46 | 1381.19±98.40  | 1977.47±95.17  | 1385.36±37.58  | 1936.93±46.36  |
| 23              | NA                      | 2368.27±110.17 | 1299.40±107.08 | 1778.64±96.93  | 1314.11±16.63  | 1707.04±85.52  |
| Days of storage | Chewiness (g × mm)      |                |                |                |                |                |

|    | Treatments <sup>€</sup> |               |               |                |               |               |
|----|-------------------------|---------------|---------------|----------------|---------------|---------------|
|    | AP                      | OSP           | AUV1          | OSUV1          | AUV3          | OSUV3         |
| 0  | 1451.43±74.16           | 1419.53±92.45 | 1406.08±77.07 | 1421.95±103.85 | 1473.88±68.03 | 1403.00±93.34 |
| 1  | 946.07±2.93             | 1443.91±95.79 | 817.60±5.96   | 944.09±36.72   | 825.62±18.82  | 971.01±17.51  |
| 2  | 917.04±22.23            | 1137.61±39.12 | 736.60±17.47  | 928.85±30.38   | 720.63±27.15  | 929.87±54.96  |
| 3  | 797.48±34.69            | 934.82±45.66  | 725.18±22.58  | 823.30±26.64   | 719.38±2.04   | 827.98±40.74  |
| 4  | 743.95±54.03            | 907.95±55.84  | 710.53±16.66  | 807.06±12.91   | 711.35±8.57   | 802.79±16.63  |
| 5  | 636.21±50.35            | 788.72±34.86  | 583.65±33.58  | 679.11±25.55   | 587.92±21.65  | 670.07±48.96  |
| 6  | 590.18±56.93            | 753.81±15.96  | 532.06±18.76  | 650.21±31.37   | 543.70±15.06  | 634.60±39.17  |
| 9  | 582.10±21.37            | 750.00±32.42  | 521.33±3.52   | 603.69±4.71    | 526.41±12.82  | 608.50±6.65   |
| 11 | 555.15±11.77            | 642.93±20.05  | 535.98±14.02  | 590.51±11.63   | 531.62±26.06  | 592.81±19.88  |
| 13 | 474.87±29.60            | 642.16±28.14  | 441.57±22.18  | 502.75±8.33    | 447.96±9.80   | 508.42±11.50  |
| 15 | NA                      | 625.12±41.52  | 434.08±4.30   | 504.62±12.62   | 435.44±16.00  | 507.76±10.46  |
| 17 | NA                      | 641.41±20.95  | 397.95±8.58   | 497.56±3.54    | 396.99±6.27   | 487.02±10.58  |
| 19 | NA                      | 591.25±58.00  | 370.38±1.85   | 436.94±8.26    | 366.50±21.21  | 421.81±3.05   |
| 21 | NA                      | 477.19±17.56  | 331.58±10.89  | 404.61±7.08    | 324.45±9.47   | 407.03±11.03  |
| 23 | NA                      | 459.60±17.12  | 296.65±12.54  | 356.96±9.40    | 293.66±10.38  | 361.33±10.29  |

| Days of storage | Cohesiveness (ratio)    |             |             |             |             |             |
|-----------------|-------------------------|-------------|-------------|-------------|-------------|-------------|
|                 | Treatments <sup>€</sup> |             |             |             |             |             |
|                 | AP                      | OSP         | AUV1        | OSUV1       | AUV3        | OSUV3       |
| 0               | 0.458±0.025             | 0.454±0.033 | 0.464±0.026 | 0.463±0.015 | 0.463±0.018 | 0.467±0.023 |
| 1               | 0.449±0.021             | 0.444±0.025 | 0.453±0.041 | 0.462±0.032 | 0.457±0.044 | 0.455±0.018 |
| 2               | 0.441±0.038             | 0.440±0.018 | 0.448±0.022 | 0.443±0.014 | 0.459±0.014 | 0.458±0.024 |
| 3               | 0.440±0.042             | 0.433±0.034 | 0.421±0.016 | 0.436±0.017 | 0.450±0.023 | 0.451±0.031 |
| 4               | 0.422±0.033             | 0.422±0.025 | 0.413±0.024 | 0.424±0.009 | 0.427±0.024 | 0.420±0.027 |
| 5               | 0.420±0.040             | 0.400±0.017 | 0.413±0.004 | 0.436±0.038 | 0.433±0.023 | 0.436±0.021 |
| 6               | 0.411±0.037             | 0.385±0.026 | 0.385±0.028 | 0.397±0.020 | 0.403±0.039 | 0.406±0.004 |
| 9               | 0.372±0.027             | 0.352±0.024 | 0.371±0.021 | 0.391±0.016 | 0.389±0.034 | 0.386±0.035 |
| 11              | 0.360±0.019             | 0.358±0.036 | 0.379±0.034 | 0.380±0.026 | 0.374±0.013 | 0.385±0.033 |
| 13              | 0.352±0.023             | 0.359±0.023 | 0.365±0.015 | 0.363±0.014 | 0.365±0.028 | 0.373±0.034 |

|    |    |             |             |             |             |             |
|----|----|-------------|-------------|-------------|-------------|-------------|
| 15 | NA | 0.341±0.006 | 0.331±0.025 | 0.342±0.034 | 0.346±0.030 | 0.337±0.012 |
| 17 | NA | 0.329±0.023 | 0.345±0.030 | 0.353±0.019 | 0.347±0.032 | 0.341±0.021 |
| 19 | NA | 0.304±0.017 | 0.315±0.011 | 0.319±0.018 | 0.318±0.011 | 0.309±0.017 |
| 21 | NA | 0.304±0.009 | 0.312±0.024 | 0.321±0.025 | 0.314±0.024 | 0.316±0.016 |
| 23 | NA | 0.282±0.011 | 0.291±0.006 | 0.282±0.017 | 0.297±0.024 | 0.284±0.011 |

|                 |                         | Springiness (ratio) |             |             |             |             |
|-----------------|-------------------------|---------------------|-------------|-------------|-------------|-------------|
| Days of storage | Treatments <sup>€</sup> |                     |             |             |             |             |
|                 | AP                      | OSP                 | AUV1        | OSUV1       | AUV3        | OSUV3       |
| 0               | 0.649±0.020             | 0.656±0.045         | 0.639±0.027 | 0.642±0.024 | 0.647±0.046 | 0.649±0.030 |
| 1               | 0.575±0.047             | 0.598±0.044         | 0.576±0.042 | 0.582±0.040 | 0.584±0.019 | 0.589±0.013 |
| 2               | 0.560±0.046             | 0.566±0.019         | 0.570±0.038 | 0.576±0.047 | 0.572±0.010 | 0.580±0.021 |
| 3               | 0.559±0.034             | 0.563±0.029         | 0.563±0.026 | 0.565±0.054 | 0.565±0.035 | 0.566±0.037 |
| 4               | 0.552±0.051             | 0.542±0.034         | 0.556±0.031 | 0.550±0.050 | 0.553±0.025 | 0.560±0.032 |
| 5               | 0.544±0.032             | 0.558±0.049         | 0.549±0.029 | 0.541±0.012 | 0.543±0.012 | 0.546±0.030 |
| 6               | 0.539±0.031             | 0.540±0.043         | 0.534±0.013 | 0.545±0.050 | 0.544±0.014 | 0.536±0.043 |
| 9               | 0.526±0.036             | 0.534±0.050         | 0.527±0.003 | 0.526±0.027 | 0.533±0.022 | 0.533±0.032 |
| 11              | 0.501±0.049             | 0.508±0.031         | 0.503±0.022 | 0.519±0.049 | 0.528±0.049 | 0.530±0.019 |
| 13              | 0.501±0.036             | 0.513±0.016         | 0.508±0.032 | 0.522±0.040 | 0.529±0.031 | 0.529±0.022 |
| 15              | NA                      | 0.496±0.028         | 0.490±0.039 | 0.500±0.050 | 0.499±0.014 | 0.492±0.038 |
| 17              | NA                      | 0.461±0.026         | 0.456±0.022 | 0.472±0.025 | 0.474±0.013 | 0.468±0.020 |
| 19              | NA                      | 0.467±0.032         | 0.446±0.044 | 0.447±0.014 | 0.451±0.023 | 0.445±0.009 |
| 21              | NA                      | 0.463±0.025         | 0.457±0.016 | 0.466±0.039 | 0.466±0.012 | 0.461±0.017 |
| 23              | NA                      | 0.430±0.034         | 0.427±0.026 | 0.434±0.024 | 0.426±0.013 | 0.422±0.017 |

|                 |                         | Resilience (ratio) |             |             |             |             |
|-----------------|-------------------------|--------------------|-------------|-------------|-------------|-------------|
| Days of storage | Treatments <sup>€</sup> |                    |             |             |             |             |
|                 | AP                      | OSP                | AUV1        | OSUV1       | AUV3        | OSUV3       |
| 0               | 0.183±0.017             | 0.182±0.015        | 0.182±0.015 | 0.183±0.015 | 0.178±0.012 | 0.185±0.012 |
| 1               | 0.174±0.014             | 0.171±0.014        | 0.167±0.014 | 0.165±0.012 | 0.165±0.007 | 0.162±0.016 |
| 2               | 0.156±0.013             | 0.152±0.013        | 0.159±0.014 | 0.160±0.014 | 0.160±0.010 | 0.158±0.008 |
| 3               | 0.146±0.010             | 0.149±0.006        | 0.153±0.010 | 0.154±0.012 | 0.156±0.014 | 0.153±0.007 |

|    |             |             |             |             |             |             |
|----|-------------|-------------|-------------|-------------|-------------|-------------|
| 4  | 0.141±0.013 | 0.138±0.011 | 0.140±0.008 | 0.143±0.010 | 0.142±0.010 | 0.140±0.003 |
| 5  | 0.135±0.011 | 0.136±0.009 | 0.139±0.007 | 0.139±0.010 | 0.144±0.011 | 0.144±0.012 |
| 6  | 0.136±0.006 | 0.133±0.010 | 0.137±0.005 | 0.140±0.014 | 0.136±0.008 | 0.138±0.010 |
| 9  | 0.132±0.010 | 0.135±0.008 | 0.131±0.007 | 0.134±0.010 | 0.131±0.012 | 0.130±0.003 |
| 11 | 0.122±0.008 | 0.120±0.004 | 0.124±0.004 | 0.125±0.010 | 0.127±0.008 | 0.125±0.006 |
| 13 | 0.114±0.008 | 0.117±0.011 | 0.116±0.009 | 0.113±0.006 | 0.116±0.010 | 0.116±0.009 |
| 15 | NA          | 0.109±0.010 | 0.110±0.005 | 0.116±0.006 | 0.115±0.008 | 0.113±0.005 |
| 17 | NA          | 0.105±0.008 | 0.103±0.009 | 0.110±0.002 | 0.116±0.011 | 0.111±0.012 |
| 19 | NA          | 0.100±0.005 | 0.103±0.010 | 0.107±0.007 | 0.109±0.008 | 0.105±0.005 |
| 21 | NA          | 0.087±0.005 | 0.088±0.007 | 0.092±0.003 | 0.092±0.006 | 0.095±0.005 |
| 23 | NA          | 0.073±0.006 | 0.075±0.005 | 0.075±0.005 | 0.078±0.007 | 0.079±0.007 |

Results are expressed as means ± standard deviation (n = 2). NA – Not applicable. <sup>e</sup>AP (air packaging); OSP (oxygen scavenger packaging); AUV1 (air packaging + UV-C at 0.102 J/cm<sup>2</sup>); OSUV1 (oxygen scavenger packaging + UV-C at 0.102 J/cm<sup>2</sup>); AUV3 (air packaging + UV-C at 0.301 J/cm<sup>2</sup>); and OSUV3 (oxygen scavenger packaging + UV-C at 0.301 J/cm<sup>2</sup>).
