# Supplementary material for: Combined effect of oxygen-scavenger packaging and UV-C radiation on shelf life of refrigerated tilapia (Oreochromis niloticus) fillets
Source: PubMed Central journal article supplement (PMC7060221; doi:10.1038/s41598-020-61293-8), 2020-03-06
Supplement: 41598_2020_61293_MOESM4_ESM.pdf [file 41598_2020_61293_MOESM4_ESM.pdf]

Combined effect of oxygen-scavenger packaging and UV-C radiation on shelf life of refrigerated tilapia (*Oreochromis niloticus*) fillets

Maria Lúcia Guerra Monteiro, Eliane Teixeira Mársico, Yhan da Silva Mutz, Vinicius Silva Castro, Rodrigo Vilela de Barros Pinto Moreira, Thiago da Silveira Álvares & Carlos Adam Conte-Junior

**Supplementary Table S1.** Individual results of free amino acids and biogenic amines of tilapia (*Oreochromis niloticus*) fillets non- and treated with oxygen scavenger and ultraviolet radiation (UV-C) stored at  $4 \pm 1$  °C for 23 days.

| Days of storage | L-lysine (mg lysine/kg fish tissue)      |            |            |            |            |            |
|-----------------|------------------------------------------|------------|------------|------------|------------|------------|
|                 | Treatments <sup>€</sup>                  |            |            |            |            |            |
|                 | AP                                       | OSP        | AUV1       | OSUV1      | AUV3       | OSUV3      |
| 0               | 8.42±0.25                                | 8.46±0.31  | 10.94±0.25 | 10.86±0.74 | 10.97±0.35 | 10.80±0.44 |
| 1               | 12.73±0.15                               | 10.88±0.88 | 14.37±0.75 | 10.89±0.08 | 14.23±0.15 | 10.76±0.21 |
| 2               | 16.34±0.77                               | 13.19±0.75 | 18.58±0.37 | 13.01±0.93 | 17.83±0.70 | 13.12±0.13 |
| 3               | 20.27±0.95                               | 15.64±0.62 | 23.39±0.54 | 15.71±0.32 | 23.82±0.29 | 15.75±0.55 |
| 4               | 24.47±0.25                               | 17.97±0.97 | 26.85±0.75 | 17.92±0.15 | 26.50±0.65 | 17.98±0.40 |
| 5               | 26.73±0.34                               | 21.06±0.87 | 29.54±0.61 | 21.09±0.08 | 29.22±0.43 | 21.13±0.30 |
| 6               | 29.23±0.37                               | 24.99±1.26 | 34.04±0.58 | 24.83±0.24 | 34.06±0.12 | 24.93±0.30 |
| 9               | 34.03±0.43                               | 28.29±0.16 | 36.89±0.76 | 28.36±0.47 | 36.64±0.36 | 28.47±0.66 |
| 11              | 38.51±0.44                               | 32.17±0.78 | 40.06±0.98 | 32.29±0.22 | 40.17±0.12 | 32.28±0.19 |
| 13              | 41.97±0.12                               | 34.39±0.35 | 44.28±0.78 | 34.49±0.26 | 44.13±0.24 | 34.50±0.40 |
| 15              | NA                                       | 36.32±0.27 | 46.00±0.06 | 36.26±0.15 | 46.15±0.38 | 36.32±0.38 |
| 17              | NA                                       | 37.86±0.33 | 47.14±0.63 | 37.77±0.38 | 47.18±0.13 | 37.84±0.04 |
| 19              | NA                                       | 40.09±0.52 | 49.25±0.37 | 40.11±0.36 | 49.36±0.09 | 40.04±0.17 |
| 21              | NA                                       | 43.05±0.74 | 52.00±0.74 | 43.01±0.14 | 52.29±0.12 | 43.08±0.13 |
| 23              | NA                                       | 45.85±0.59 | 53.45±0.68 | 45.81±0.04 | 53.81±0.38 | 45.96±0.30 |
| Days of storage | L-ornithine (mg ornitine/kg fish tissue) |            |            |            |            |            |

|    | Treatments <sup>€</sup> |           |           |           |           |           |
|----|-------------------------|-----------|-----------|-----------|-----------|-----------|
|    | AP                      | OSP       | AUV1      | OSUV1     | AUV3      | OSUV3     |
| 0  | 1.39±0.12               | 1.40±0.03 | 1.95±0.07 | 1.83±0.07 | 1.94±0.08 | 1.85±0.10 |
| 1  | 1.82±0.03               | 1.58±0.04 | 2.11±0.05 | 1.78±0.05 | 2.13±0.07 | 1.83±0.10 |
| 2  | 2.18±0.10               | 1.71±0.04 | 2.62±0.12 | 1.82±0.11 | 2.65±0.08 | 1.76±0.08 |
| 3  | 2.99±0.07               | 1.96±0.06 | 3.29±0.06 | 2.01±0.01 | 3.33±0.08 | 2.01±0.06 |
| 4  | 3.26±0.22               | 2.31±0.12 | 3.73±0.12 | 2.33±0.11 | 3.66±0.13 | 2.36±0.13 |
| 5  | 3.64±0.08               | 2.60±0.03 | 3.98±0.03 | 2.63±0.18 | 3.95±0.06 | 2.68±0.12 |
| 6  | 3.84±0.10               | 2.86±0.17 | 4.21±0.11 | 2.84±0.19 | 4.20±0.09 | 2.86±0.07 |
| 9  | 4.28±0.01               | 3.01±0.06 | 4.61±0.02 | 3.05±0.07 | 4.63±0.15 | 3.06±0.02 |
| 11 | 4.63±0.04               | 3.20±0.04 | 4.92±0.10 | 3.24±0.17 | 4.90±0.12 | 3.25±0.02 |
| 13 | 4.83±0.10               | 3.63±0.04 | 5.16±0.03 | 3.57±0.09 | 5.12±0.10 | 3.61±0.10 |
| 15 | NA                      | 3.81±0.12 | 5.53±0.11 | 3.87±0.12 | 5.59±0.09 | 3.84±0.16 |
| 17 | NA                      | 4.06±0.11 | 5.84±0.02 | 4.08±0.05 | 5.87±0.14 | 4.10±0.07 |
| 19 | NA                      | 4.17±0.07 | 5.96±0.06 | 4.22±0.11 | 5.99±0.01 | 4.25±0.12 |
| 21 | NA                      | 4.33±0.13 | 6.18±0.11 | 4.32±0.20 | 6.17±0.15 | 4.29±0.17 |
| 23 | NA                      | 4.61±0.07 | 6.42±0.15 | 4.64±0.16 | 6.45±0.15 | 4.69±0.09 |

| Days of storage | L-arginine (mg arginine/kg fish tissue) |            |            |            |            |            |
|-----------------|-----------------------------------------|------------|------------|------------|------------|------------|
|                 | Treatments <sup>€</sup>                 |            |            |            |            |            |
|                 | AP                                      | OSP        | AUV1       | OSUV1      | AUV3       | OSUV3      |
| 0               | 9.13±0.03                               | 9.06±0.19  | 9.43±0.04  | 9.42±0.14  | 9.42±0.14  | 9.50±0.12  |
| 1               | 9.34±0.14                               | 9.20±0.11  | 9.76±0.05  | 9.39±0.12  | 9.80±0.11  | 9.38±0.30  |
| 2               | 13.14±0.62                              | 10.34±0.07 | 17.76±1.57 | 10.40±0.24 | 17.65±0.81 | 10.36±0.34 |
| 3               | 16.13±0.50                              | 12.68±0.91 | 19.92±0.74 | 12.23±0.28 | 20.07±0.14 | 12.35±0.09 |
| 4               | 22.32±0.89                              | 14.65±0.65 | 24.59±0.55 | 14.71±0.72 | 24.69±0.90 | 14.77±0.20 |
| 5               | 25.51±0.40                              | 17.39±1.56 | 27.77±0.63 | 17.18±0.56 | 27.88±0.60 | 17.67±0.22 |
| 6               | 29.01±0.16                              | 20.73±1.23 | 33.37±0.84 | 20.67±0.60 | 33.75±1.00 | 20.48±0.26 |
| 9               | 32.60±1.21                              | 21.94±0.98 | 35.49±0.06 | 21.96±0.57 | 35.46±0.22 | 21.91±0.56 |
| 11              | 34.96±3.08                              | 25.76±0.16 | 36.74±0.78 | 25.86±0.32 | 36.60±0.12 | 25.78±0.18 |
| 13              | 37.33±0.06                              | 27.52±1.55 | 40.20±0.19 | 27.63±0.29 | 40.28±0.92 | 27.67±0.33 |

|    |    |            |            |            |            |            |
|----|----|------------|------------|------------|------------|------------|
| 15 | NA | 29.33±1.62 | 44.19±0.59 | 29.38±0.24 | 44.08±0.60 | 29.43±0.37 |
| 17 | NA | 32.99±2.70 | 46.93±1.30 | 32.85±0.17 | 46.76±1.41 | 32.73±0.20 |
| 19 | NA | 34.20±0.37 | 49.34±0.75 | 34.36±0.40 | 49.16±0.63 | 34.47±0.20 |
| 21 | NA | 36.79±0.80 | 51.95±1.06 | 36.36±0.53 | 51.90±0.25 | 36.20±0.70 |
| 23 | NA | 37.74±1.23 | 52.94±1.02 | 37.73±0.23 | 52.64±0.84 | 37.75±0.22 |

Cadaverine (mg cadaverine/kg fish tissue)

| Days of storage | Treatments <sup>€</sup> |           |           |           |           |           |
|-----------------|-------------------------|-----------|-----------|-----------|-----------|-----------|
|                 | AP                      | OSP       | AUV1      | OSUV1     | AUV3      | OSUV3     |
| 0               | 1.89±0.09               | 1.90±0.03 | 1.86±0.09 | 1.88±0.05 | 1.91±0.05 | 1.88±0.08 |
| 1               | 2.23±0.07               | 1.96±0.06 | 2.24±0.09 | 1.95±0.04 | 2.27±0.06 | 1.91±0.09 |
| 2               | 2.50±0.18               | 2.07±0.11 | 2.56±0.04 | 2.08±0.08 | 2.59±0.12 | 2.10±0.08 |
| 3               | 2.82±0.14               | 2.33±0.09 | 2.85±0.08 | 2.37±0.11 | 2.87±0.05 | 2.33±0.10 |
| 4               | 3.12±0.17               | 2.50±0.05 | 3.16±0.12 | 2.45±0.09 | 3.15±0.16 | 2.46±0.08 |
| 5               | 3.55±0.04               | 2.70±0.07 | 3.51±0.14 | 2.72±0.10 | 3.56±0.06 | 2.76±0.10 |
| 6               | 3.83±0.02               | 2.78±0.02 | 3.82±0.11 | 2.81±0.08 | 3.81±0.13 | 2.83±0.09 |
| 9               | 4.16±0.17               | 3.12±0.09 | 4.20±0.09 | 3.14±0.12 | 4.22±0.09 | 3.17±0.10 |
| 11              | 4.47±0.18               | 3.57±0.11 | 4.48±0.07 | 3.55±0.08 | 4.49±0.04 | 3.58±0.04 |
| 13              | 4.82±0.29               | 3.81±0.09 | 4.87±0.04 | 3.87±0.05 | 4.80±0.09 | 3.89±0.05 |
| 15              | NA                      | 3.97±0.04 | 5.05±0.01 | 4.03±0.07 | 5.06±0.16 | 4.01±0.06 |
| 17              | NA                      | 4.09±0.07 | 5.31±0.04 | 4.05±0.05 | 5.32±0.04 | 4.07±0.04 |
| 19              | NA                      | 4.25±0.01 | 5.35±0.03 | 4.23±0.13 | 5.38±0.08 | 4.28±0.10 |
| 21              | NA                      | 4.57±0.10 | 5.84±0.11 | 4.52±0.11 | 5.81±0.10 | 4.50±0.14 |
| 23              | NA                      | 4.60±0.07 | 5.97±0.04 | 4.65±0.08 | 5.93±0.05 | 4.68±0.08 |

Putrescine (mg putrescine/kg fish tissue)

| Days of storage | Treatments <sup>€</sup> |            |            |            |            |            |
|-----------------|-------------------------|------------|------------|------------|------------|------------|
|                 | AP                      | OSP        | AUV1       | OSUV1      | AUV3       | OSUV3      |
| 0               | 12.00±0.04              | 11.75±0.59 | 12.05±0.11 | 12.18±0.34 | 12.19±0.23 | 12.04±0.71 |
| 1               | 12.13±0.50              | 11.48±0.01 | 12.01±0.03 | 11.53±0.09 | 12.11±0.09 | 11.50±0.01 |
| 2               | 12.53±0.00              | 11.51±0.00 | 12.57±0.01 | 11.52±0.07 | 12.59±0.10 | 11.51±0.27 |
| 3               | 12.92±0.06              | 11.53±0.00 | 12.94±0.56 | 11.52±0.01 | 12.97±0.12 | 11.52±0.18 |

|    |            |            |            |            |            |            |
|----|------------|------------|------------|------------|------------|------------|
| 4  | 13.56±0.01 | 11.56±0.00 | 13.55±0.02 | 11.54±0.15 | 13.54±0.01 | 11.57±0.22 |
| 5  | 13.68±0.06 | 11.57±0.01 | 13.61±0.05 | 11.60±0.04 | 13.68±0.27 | 11.64±0.18 |
| 6  | 13.77±0.03 | 11.70±0.02 | 13.85±0.08 | 11.74±0.04 | 13.91±0.09 | 11.72±0.20 |
| 9  | 14.17±0.05 | 12.27±0.76 | 14.19±0.13 | 12.37±0.09 | 14.24±0.34 | 12.30±0.02 |
| 11 | 14.54±0.01 | 12.60±0.00 | 14.55±0.03 | 12.62±0.04 | 14.58±0.04 | 12.54±0.16 |
| 13 | 16.56±0.01 | 12.88±0.27 | 15.66±0.19 | 12.91±0.06 | 15.62±0.14 | 12.86±0.11 |
| 15 | NA         | 13.16±0.03 | 15.69±0.02 | 13.21±0.14 | 15.70±0.04 | 13.19±0.04 |
| 17 | NA         | 13.25±0.66 | 15.91±0.02 | 13.30±0.39 | 15.94±0.09 | 13.27±0.08 |
| 19 | NA         | 13.51±0.65 | 16.31±0.02 | 13.59±0.10 | 16.35±0.13 | 13.51±0.14 |
| 21 | NA         | 14.38±0.03 | 16.52±0.36 | 14.45±0.14 | 16.48±0.01 | 14.44±0.09 |
| 23 | NA         | 14.80±0.12 | 16.54±0.08 | 14.88±0.11 | 16.63±0.40 | 14.86±0.07 |

Spermidine (mg spermidine/kg fish tissue)

| Days of storage | Treatments <sup>€</sup> |           |           |           |           |           |
|-----------------|-------------------------|-----------|-----------|-----------|-----------|-----------|
|                 | AP                      | OSP       | AUV1      | OSUV1     | AUV3      | OSUV3     |
| 0               | 0.95±0.06               | 0.93±0.08 | 0.99±0.22 | 0.97±0.04 | 0.98±0.03 | 0.97±0.03 |
| 1               | 1.13±0.08               | 0.97±0.02 | 1.11±0.07 | 0.98±0.02 | 1.12±0.08 | 0.98±0.04 |
| 2               | 1.33±0.13               | 1.05±0.05 | 1.36±0.07 | 1.08±0.06 | 1.40±0.08 | 1.09±0.03 |
| 3               | 1.50±0.06               | 1.22±0.10 | 1.48±0.08 | 1.25±0.08 | 1.46±0.07 | 1.20±0.07 |
| 4               | 1.58±0.06               | 1.32±0.08 | 1.62±0.12 | 1.37±0.09 | 1.57±0.06 | 1.35±0.08 |
| 5               | 1.80±0.01               | 1.45±0.08 | 1.83±0.03 | 1.43±0.08 | 1.84±0.07 | 1.46±0.04 |
| 6               | 2.03±0.04               | 1.64±0.05 | 2.04±0.08 | 1.65±0.12 | 2.05±0.02 | 1.65±0.01 |
| 9               | 2.26±0.21               | 1.86±0.01 | 2.29±0.13 | 1.83±0.08 | 2.22±0.09 | 1.85±0.08 |
| 11              | 2.81±0.05               | 2.05±0.07 | 2.82±0.03 | 2.06±0.05 | 2.84±0.08 | 2.07±0.07 |
| 13              | 3.21±0.16               | 2.41±0.22 | 3.24±0.07 | 2.44±0.09 | 3.28±0.17 | 2.47±0.06 |
| 15              | NA                      | 2.66±0.07 | 3.52±0.13 | 2.62±0.04 | 3.58±0.03 | 2.68±0.10 |
| 17              | NA                      | 2.90±0.06 | 3.72±0.14 | 2.93±0.08 | 3.76±0.03 | 2.92±0.04 |
| 19              | NA                      | 3.27±0.19 | 3.95±0.07 | 3.25±0.09 | 3.92±0.03 | 3.27±0.08 |
| 21              | NA                      | 3.76±0.15 | 4.18±0.19 | 3.74±0.15 | 4.20±0.11 | 3.75±0.07 |
| 23              | NA                      | 3.78±0.07 | 4.54±0.09 | 3.79±0.09 | 4.64±0.16 | 3.77±0.08 |

Results are expressed as means  $\pm$  standard deviation (n = 2). NA – Not applicable. <sup>e</sup>AP (air packaging); OSP (oxygen scavenger packaging); AUV1 (air packaging + UV-C at 0.102 J/cm<sup>2</sup>); OSUV1 (oxygen scavenger packaging + UV-C at 0.102 J/cm<sup>2</sup>); AUV3 (air packaging + UV-C at 0.301 J/cm<sup>2</sup>); and OSUV3 (oxygen scavenger packaging + UV-C at 0.301 J/cm<sup>2</sup>).
